# Supplementary material
Source: Springer Nature journal article supplement (https://www.springermedizin.de/resource/supplementary/12968_2011_2623_MOESM3_ESM.pdf/9582282)

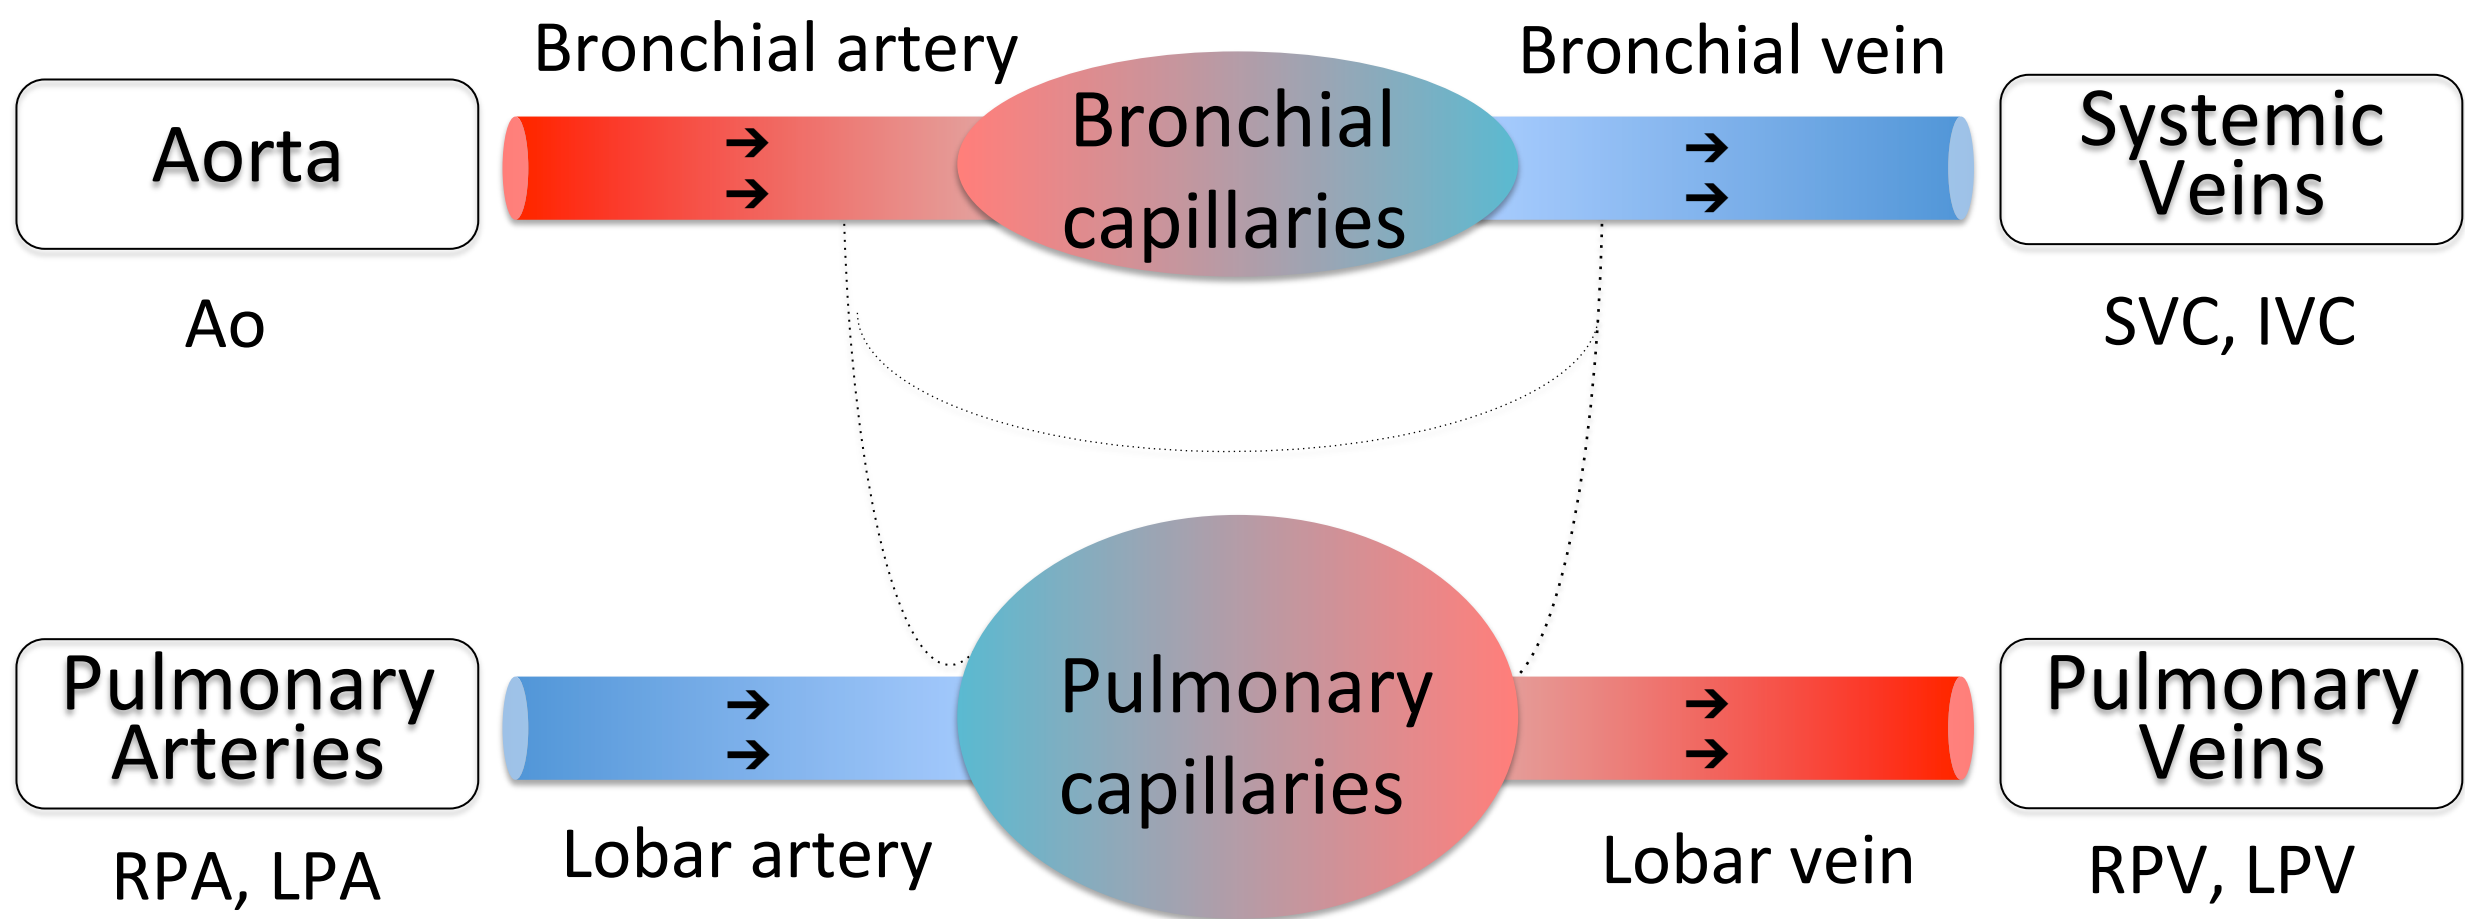

## A. Normal physiology

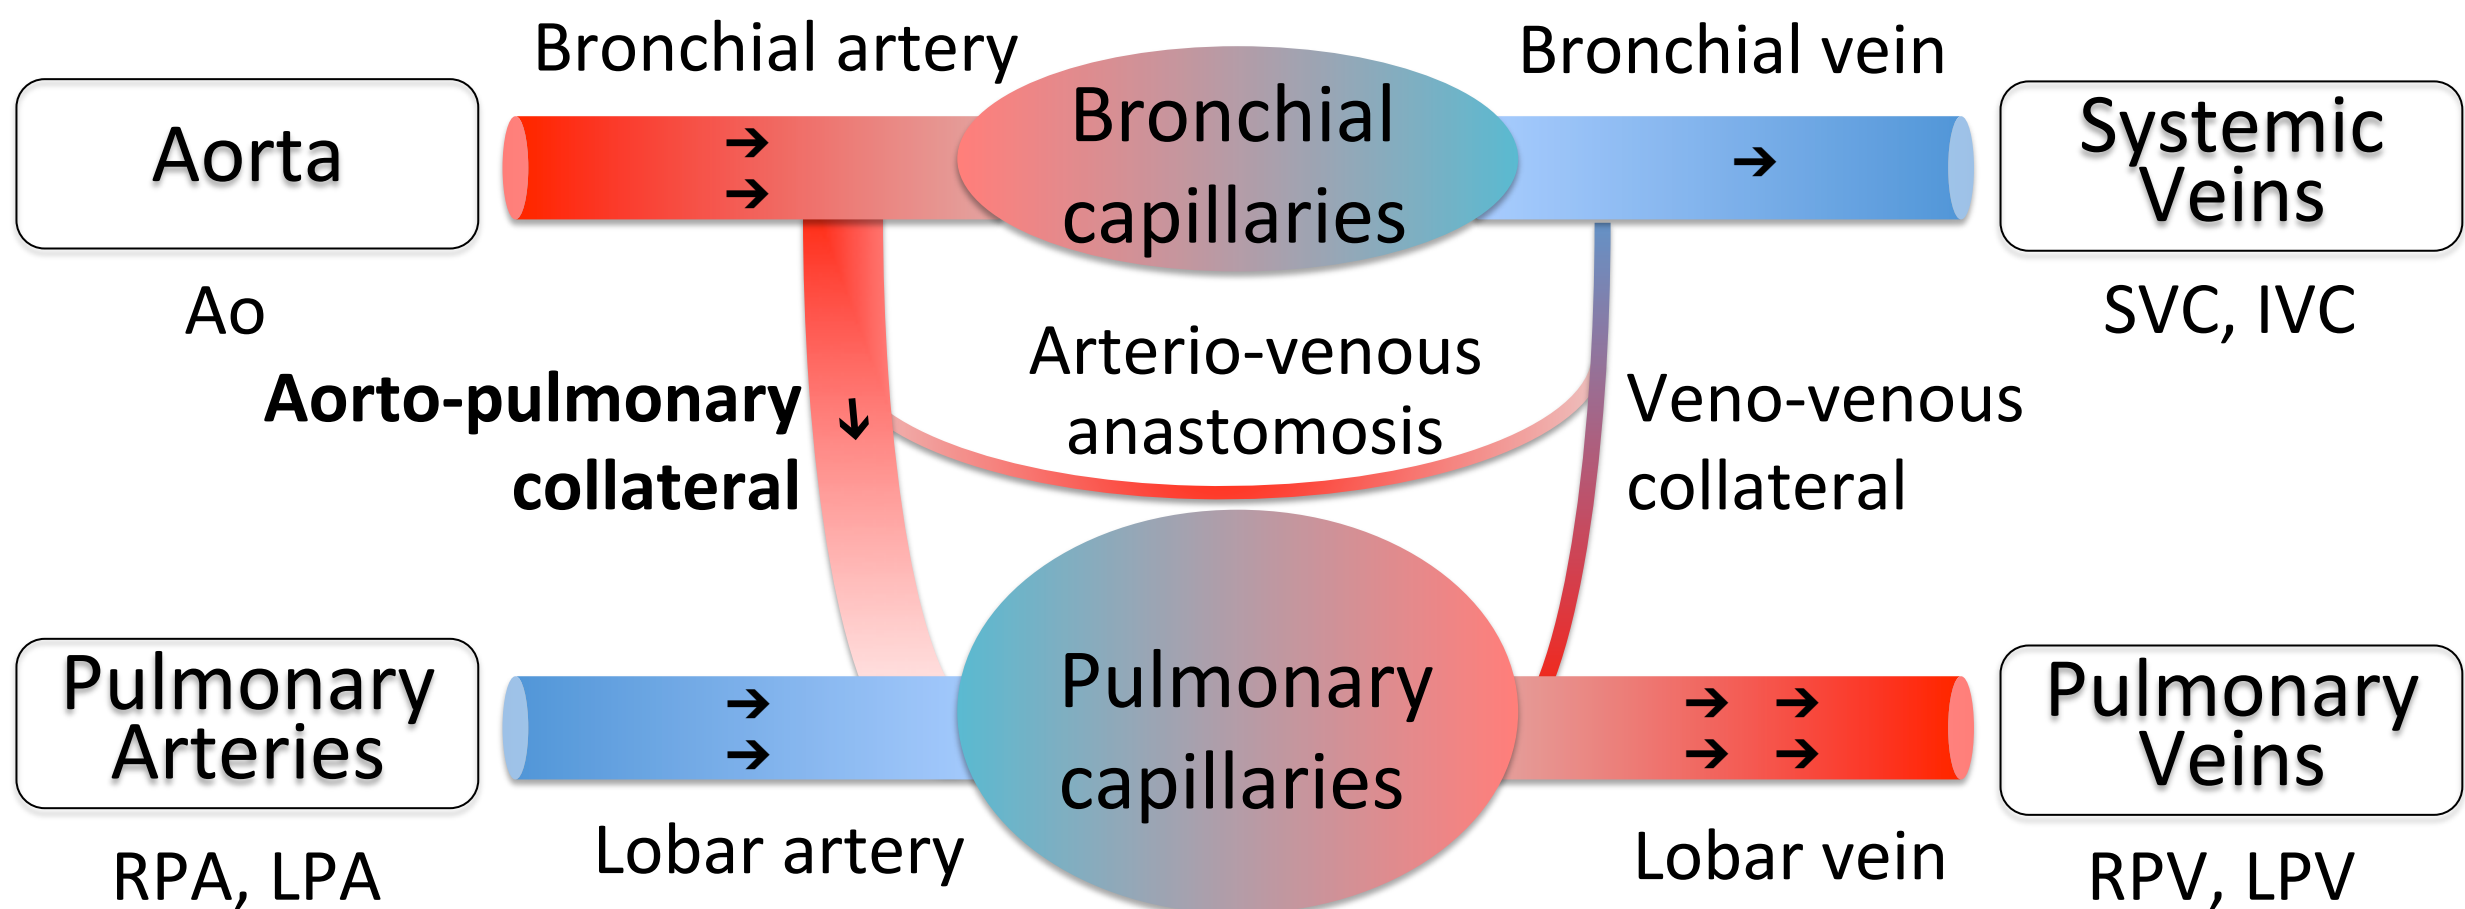

## B. Collateral circulation

Supplement: MOESM3 [file 9582282]
